# Supplementary material for: Fabrication of magnetic core–shell nanocomposites with superior performance for water treatment
Source: Royal Society of Chemistry journal article supplement (doi:10.1039/c2ta00409g), 2012-11-16
Supplement: c2ta00409g.pdf [file c2ta00409g.pdf]

**Electronic Supplementary Information for:**

**Fabrication of magnetic core-shell nanocomposites with superior performance for water treatment**

Shengtao Xing, Dongyuan Zhao, Wenjuan Yang, Zichuan Ma\*, Yinsu Wu, Yuanzhe

Gao, Weirong Chen and Jiao Han

College of Chemistry and Material Sciences, Hebei Normal University, Shijiazhuang

050024, PR China

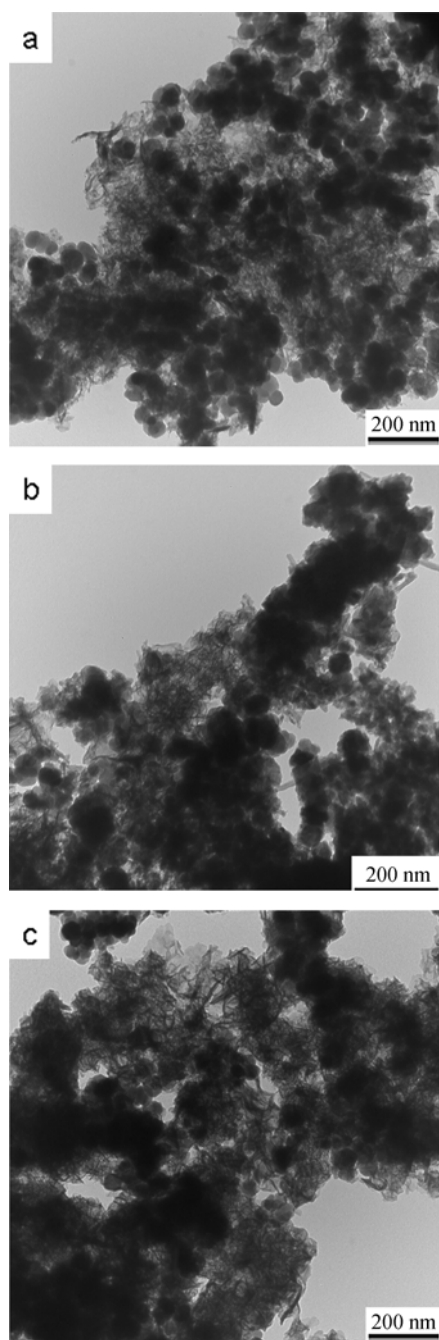

**Fig. S1** Low-magnification TEM images of (a) FC, (b) FM, and (c) FCM.

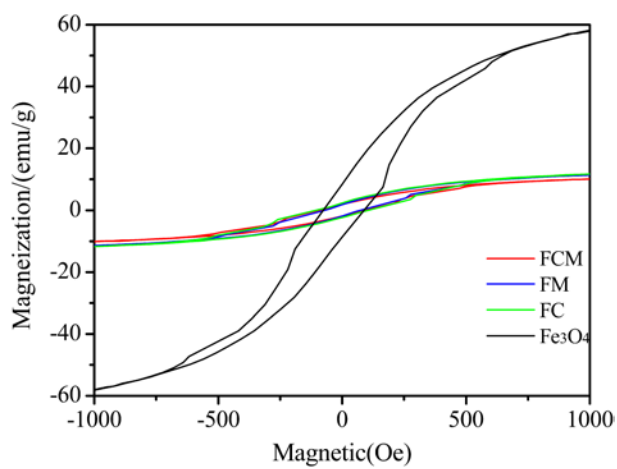

**Fig. S2** Room-temperature magnetization loops of different samples.

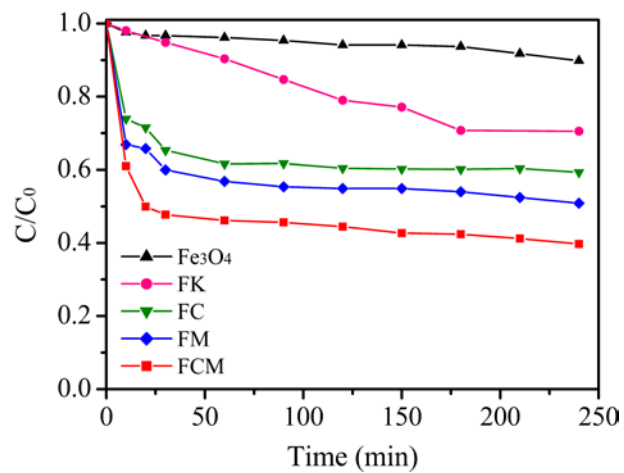

**Fig. S3** Adsorption kinetics of MB on different materials at pH 6.5.

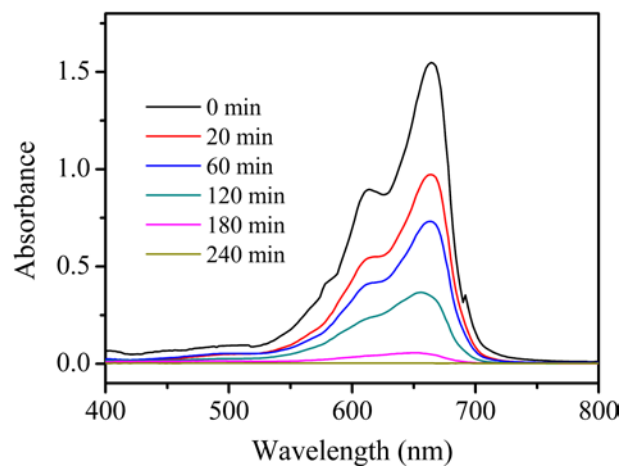

**Fig. S4** Visible absorption spectra of the (MB + H<sub>2</sub>O<sub>2</sub> + FCM) solution at pH 6.5 as a function of time.

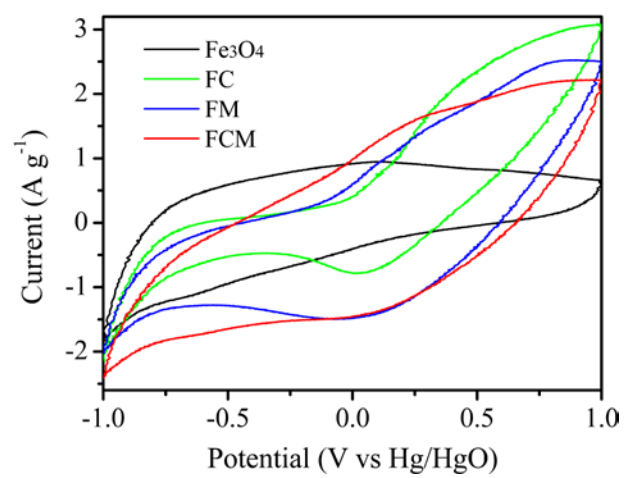

**Fig. S5** Cyclic voltammograms of different samples.
